# Supplementary material for: A fluorescence immunoassay based on CdTe : Zn/ZnS quantum dots for the rapid detection of bacteria, taking Delftia tsuruhatensis CM’13 as an example
Source: Royal Society of Chemistry journal article supplement (doi:10.1039/c9ra08651j), 2019-12-11
Supplement: c9ra08651j1.pdf [file c9ra08651j1.pdf]

### Supplementary Information 1

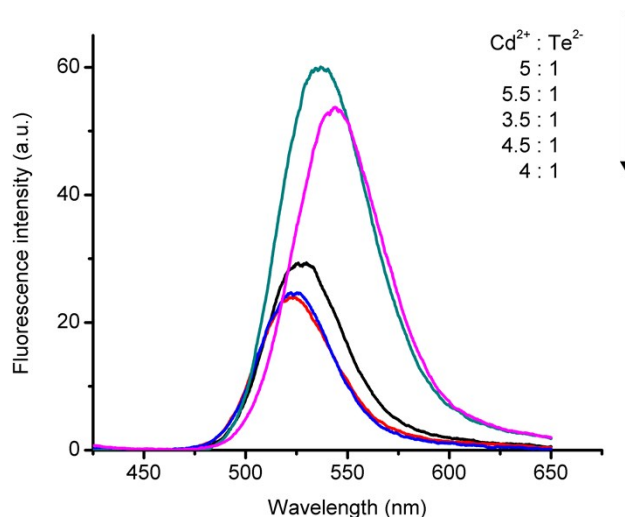

**Fig. 1.1** Effect of ratios of  $[\text{Cd}^{2+}] / [\text{Te}^{2-}]$  on the fluorescence intensity of CdTe: Zn QDs

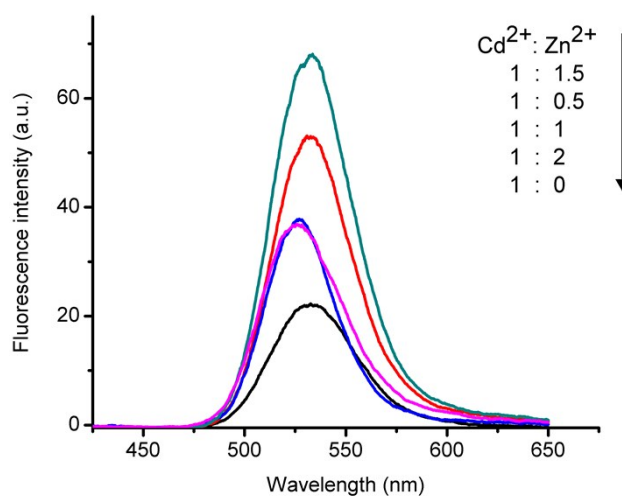

**Fig. 1.2** Effect of ratios of  $[\text{Cd}^{2+}] / [\text{Zn}^{2+}]$  on the fluorescence intensity of CdTe: Zn QDs

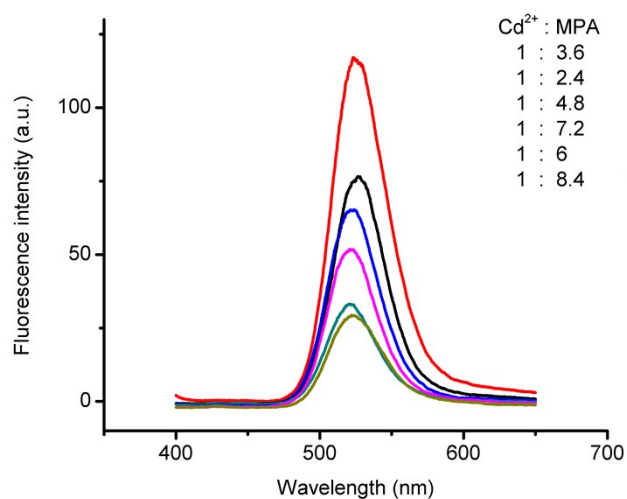

**Fig. 1.3** Effect of ratios of  $[\text{MPA}] / [\text{Cd}^{2+}]$  on the fluorescence intensity of CdTe: Zn QDs

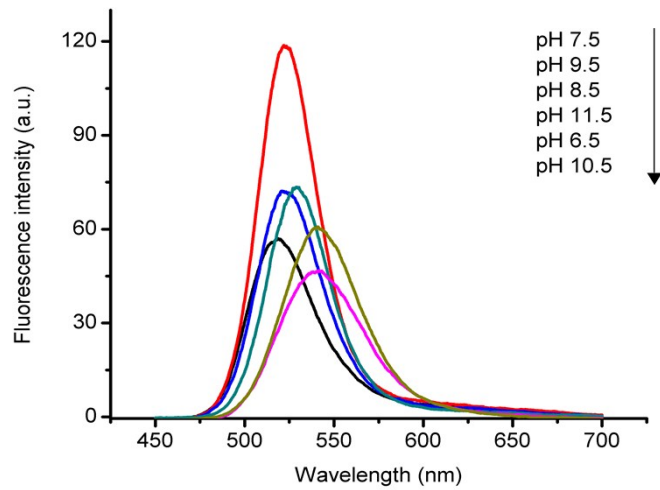

**Fig. 1.4** Effect of pH on the fluorescence intensity of CdTe: Zn QDs

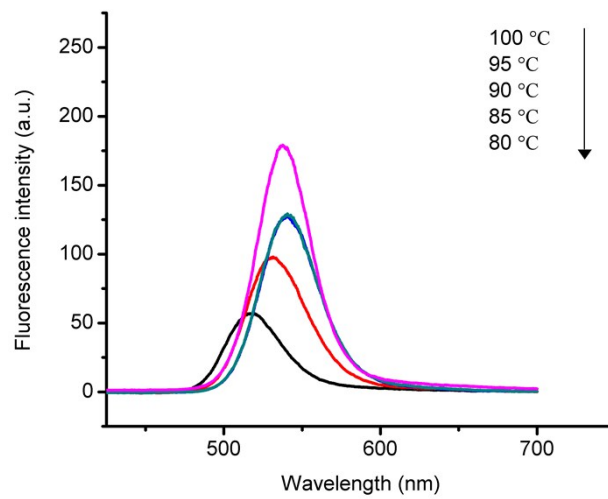

**Fig. 1.5** Effect of reaction temperature on the fluorescence intensity of CdTe: Zn QDs

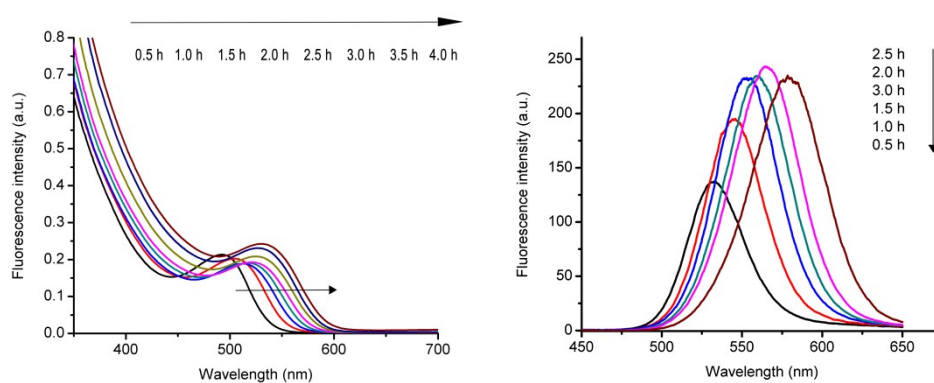

**Fig. 1.6** Absorption spectra (left) and fluorescence emission spectra (right) of CdTe: Zn QDs under different reflux reaction time

## Supplementary Information 2

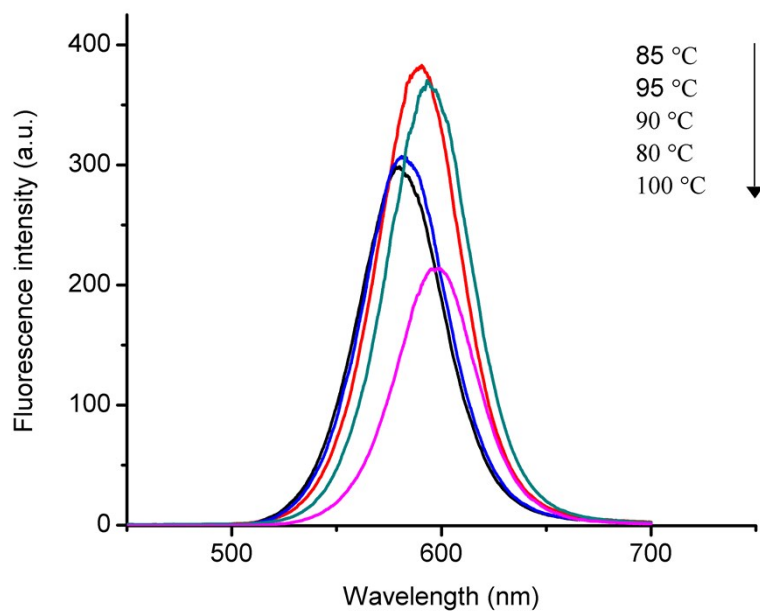

**Fig. 2.1** Effect of reflux reaction temperature on the fluorescence intensity of CdTe: Zn/ ZnS QDs

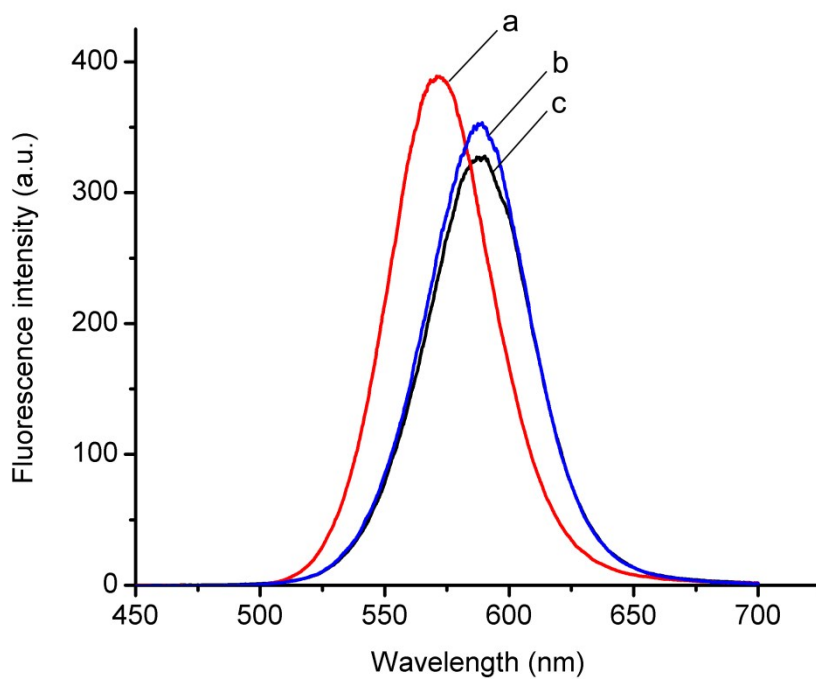

**Fig. 2.2** Effect of addition styles of zinc precursor and sulfur precursor on the fluorescence intensity of CdTe: Zn/ZnS QDs

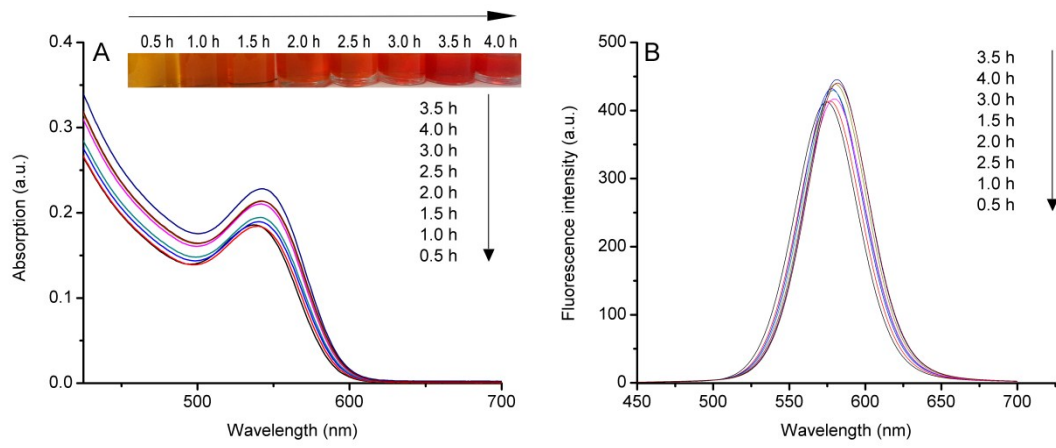

**Fig. 2.3** Effect of reflux reaction time on the absorption spectra (A) and fluorescence emission spectra (B) of CdTe: Zn/ZnS QDs

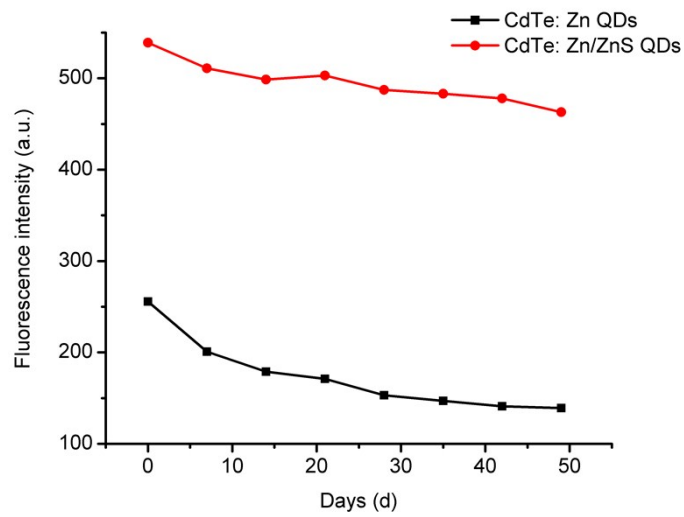

**Fig. 2.4** Comparisons of stability between CdTe: Zn/ZnS QDs and CdTe: Zn QDs

### Supplementary Information 3

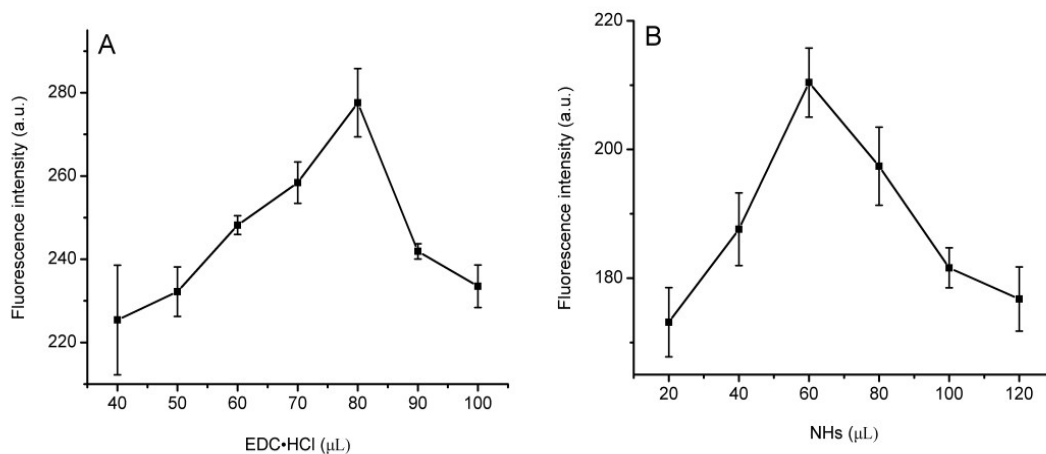

**Fig. 3.1** Impacts of amount of EDC·HCl (A) and NHs (B) on the fluorescence intensity of CdTe: Zn/ZnS QDs-antibody conjugation

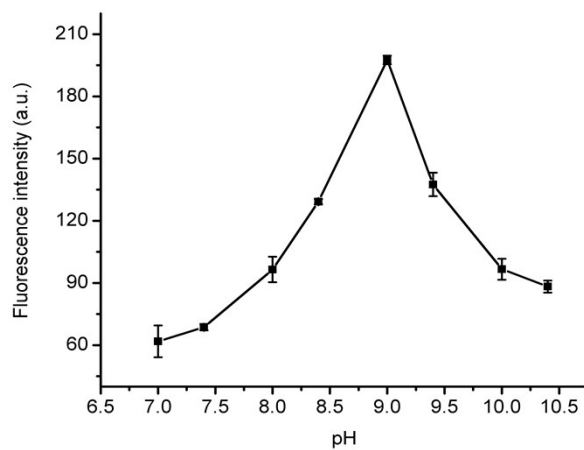

**Fig. 3.2** Impacts of pH value on the fluorescence intensity of CdTe: Zn/ZnS QDs-antibody

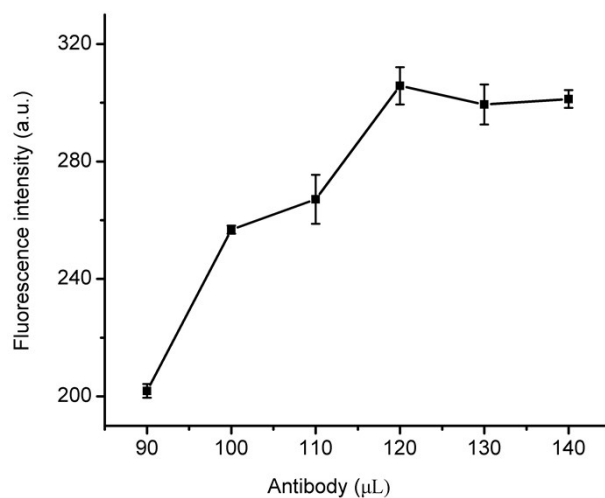

**Fig. 3.3** Effect of the amount of antibody on the fluorescence intensity of CdTe: Zn/ZnS QDs-antibody conjugations

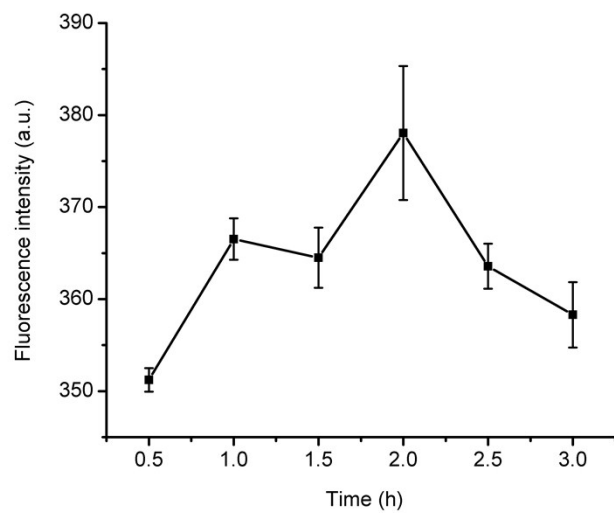

**Fig. 3.4** Impact of react time on the fluorescence intensity of CdTe: Zn/ZnS QDs-antibody conjugations

## Supplementary Information 4

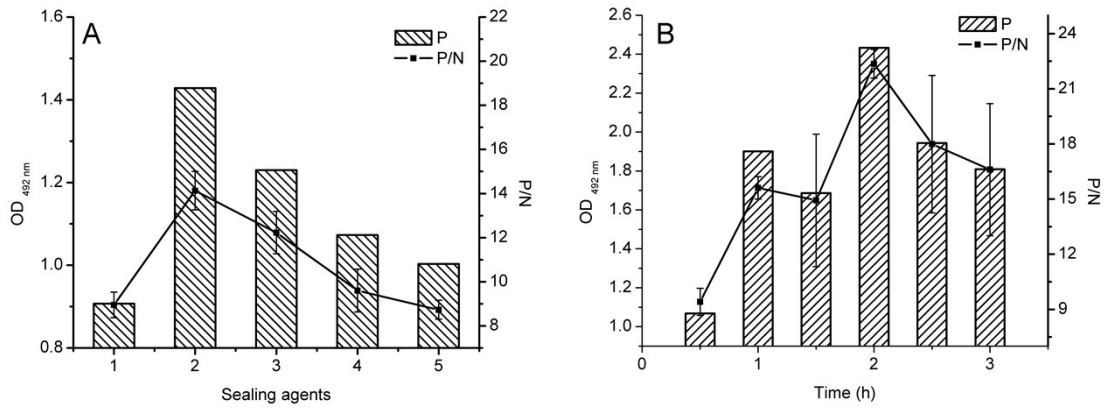

**Fig. 4.1** Sealing agents (A) and Sealing time (B)

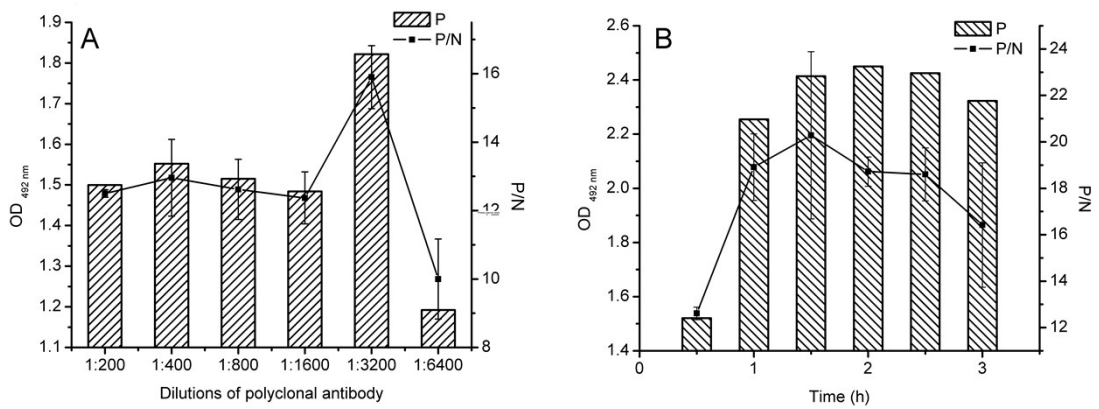

**Fig. 4.2** Concentrations of protein of serum (A) and reaction time (B)

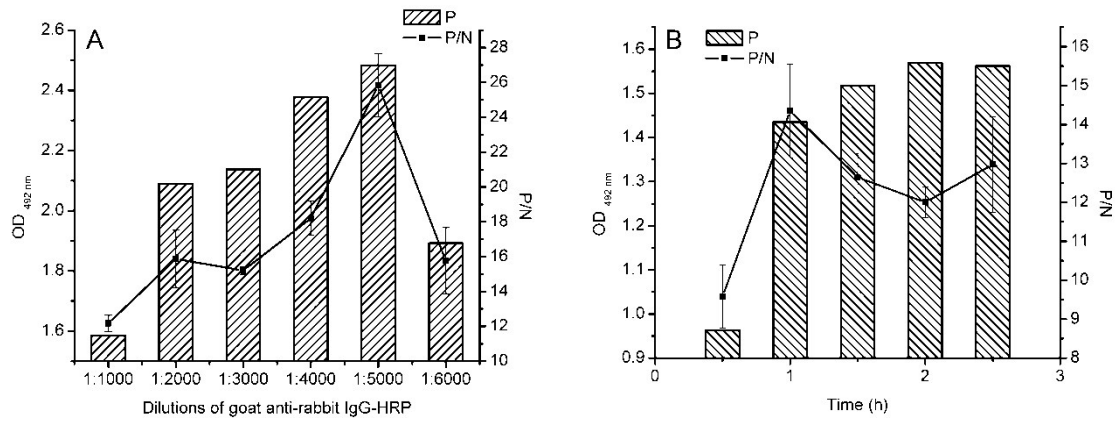

**Fig. 4.3** The addition of goat anti-rabbit IgG-CdTe: Zn/ZnS QDs (A) and reaction time (B)

## Supplementary information 5

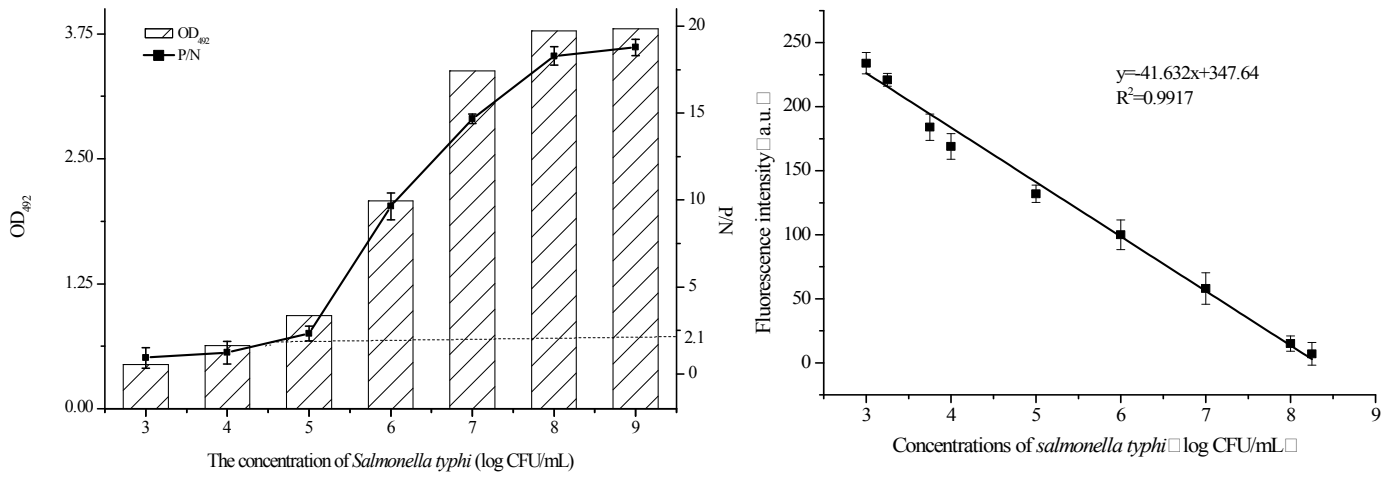

**Fig. 5.1** Detection limits of ELISA (left) and FLISA (right) detected *Salmonella typhi*, respectively

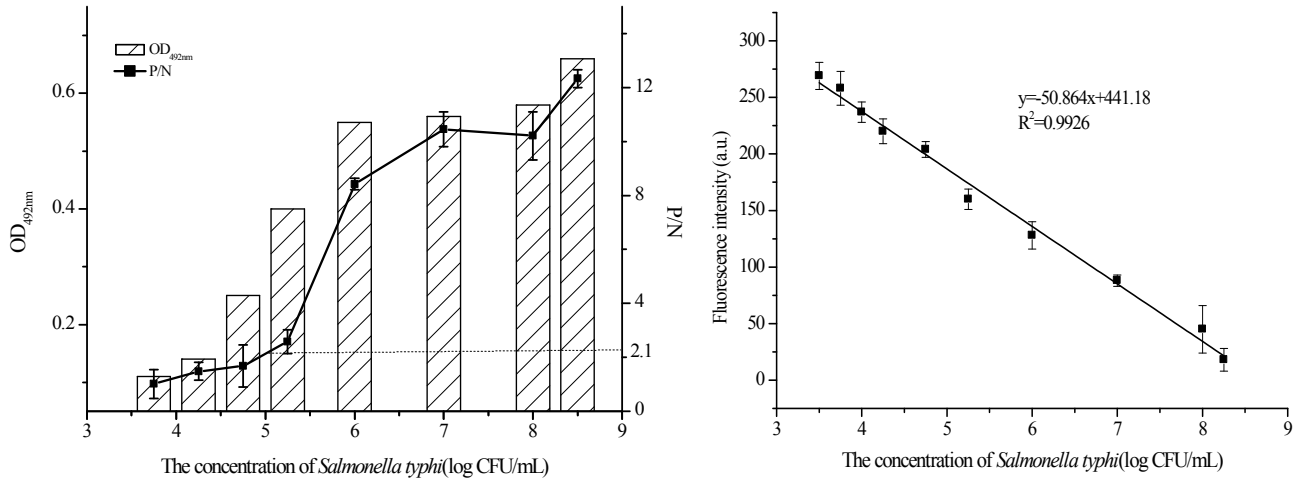

**Fig. 5.2** ELISA (left) and FLISA (right) detected *Salmonella typhi* in artificial contamination test



Supplementary information 6

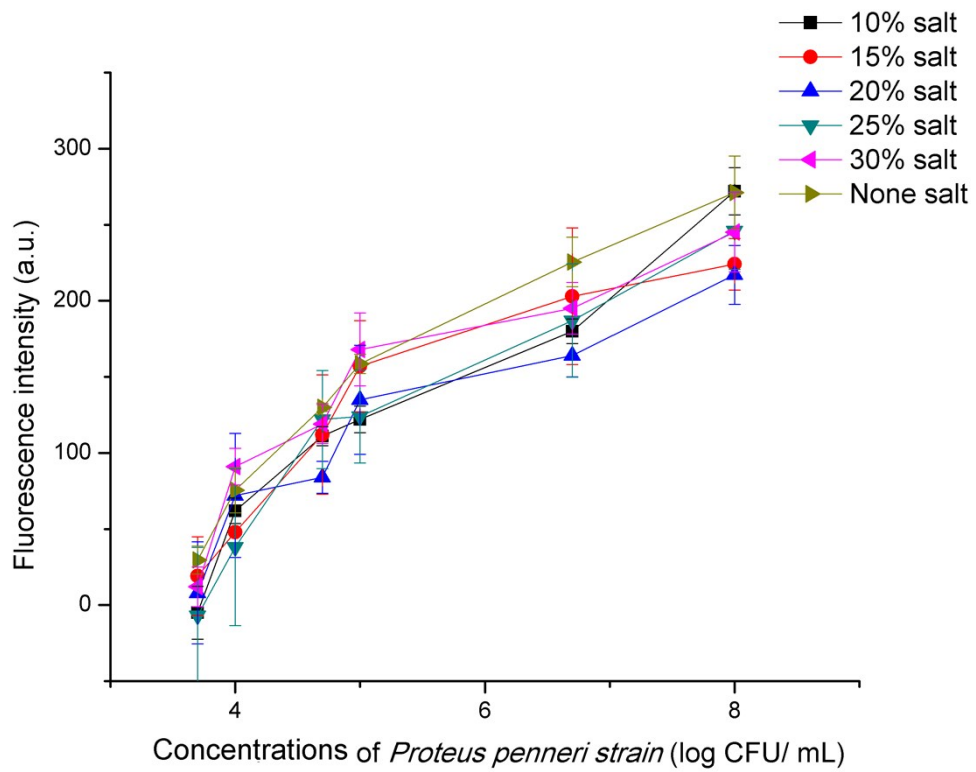

Fig. 6.1 Effect of salt (NaCl) on the detection of *Proteus penneri* strain of FLISA

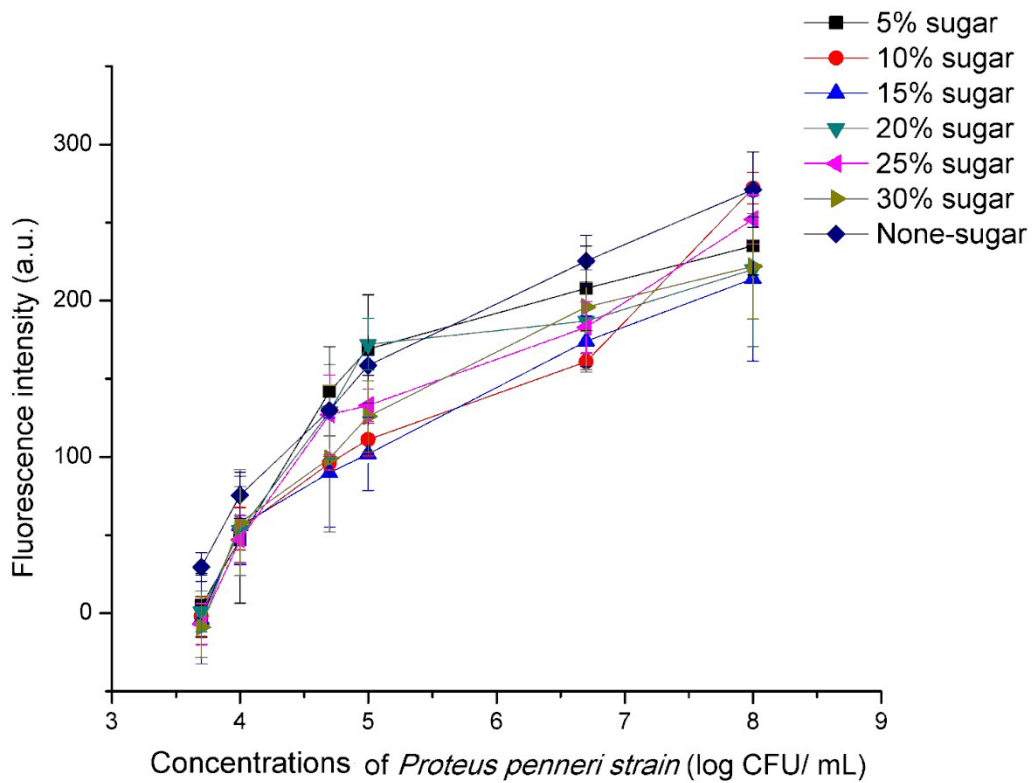

Fig. 6.2 Effect of sugar (glucose) on the detection of *Proteus penneri* strain of FLISA

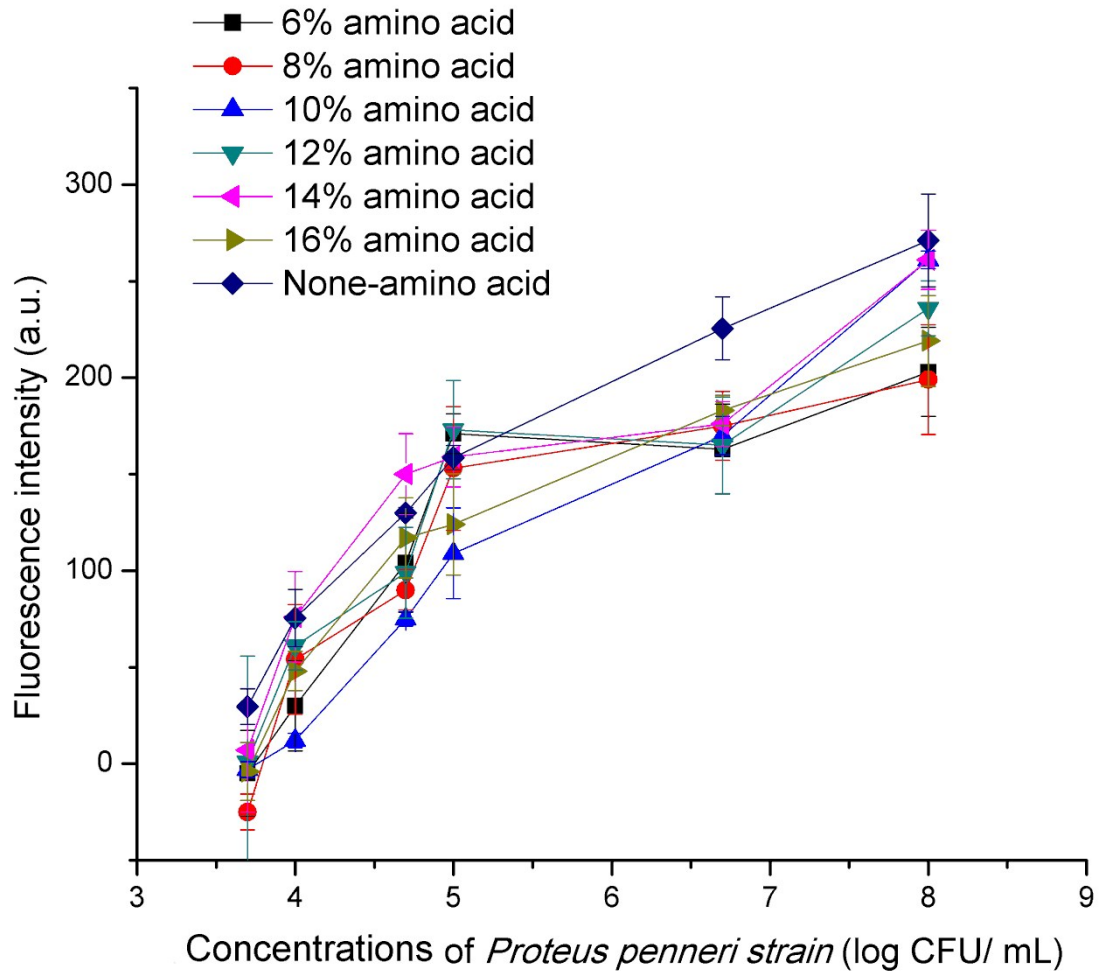

**Fig. 6.3** Effect of amino acid (L-Met) on the detection of *Proteus penneri* strain of FLISA

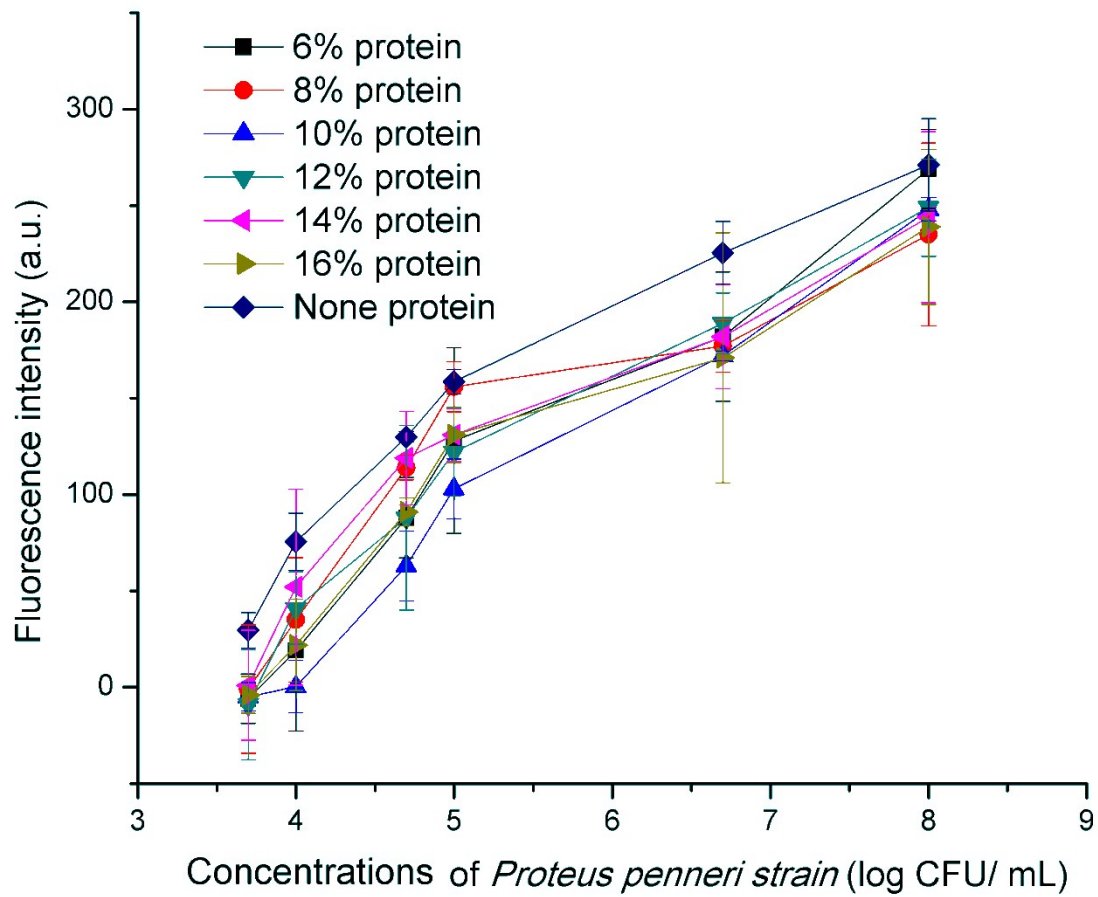

**Fig.6.4** Effect of protein (whey protein) on the detection of *Proteus penneri* strain of FLISA
